# Supplementary material
Source: PubMed Central journal article supplement (PMC6761502)

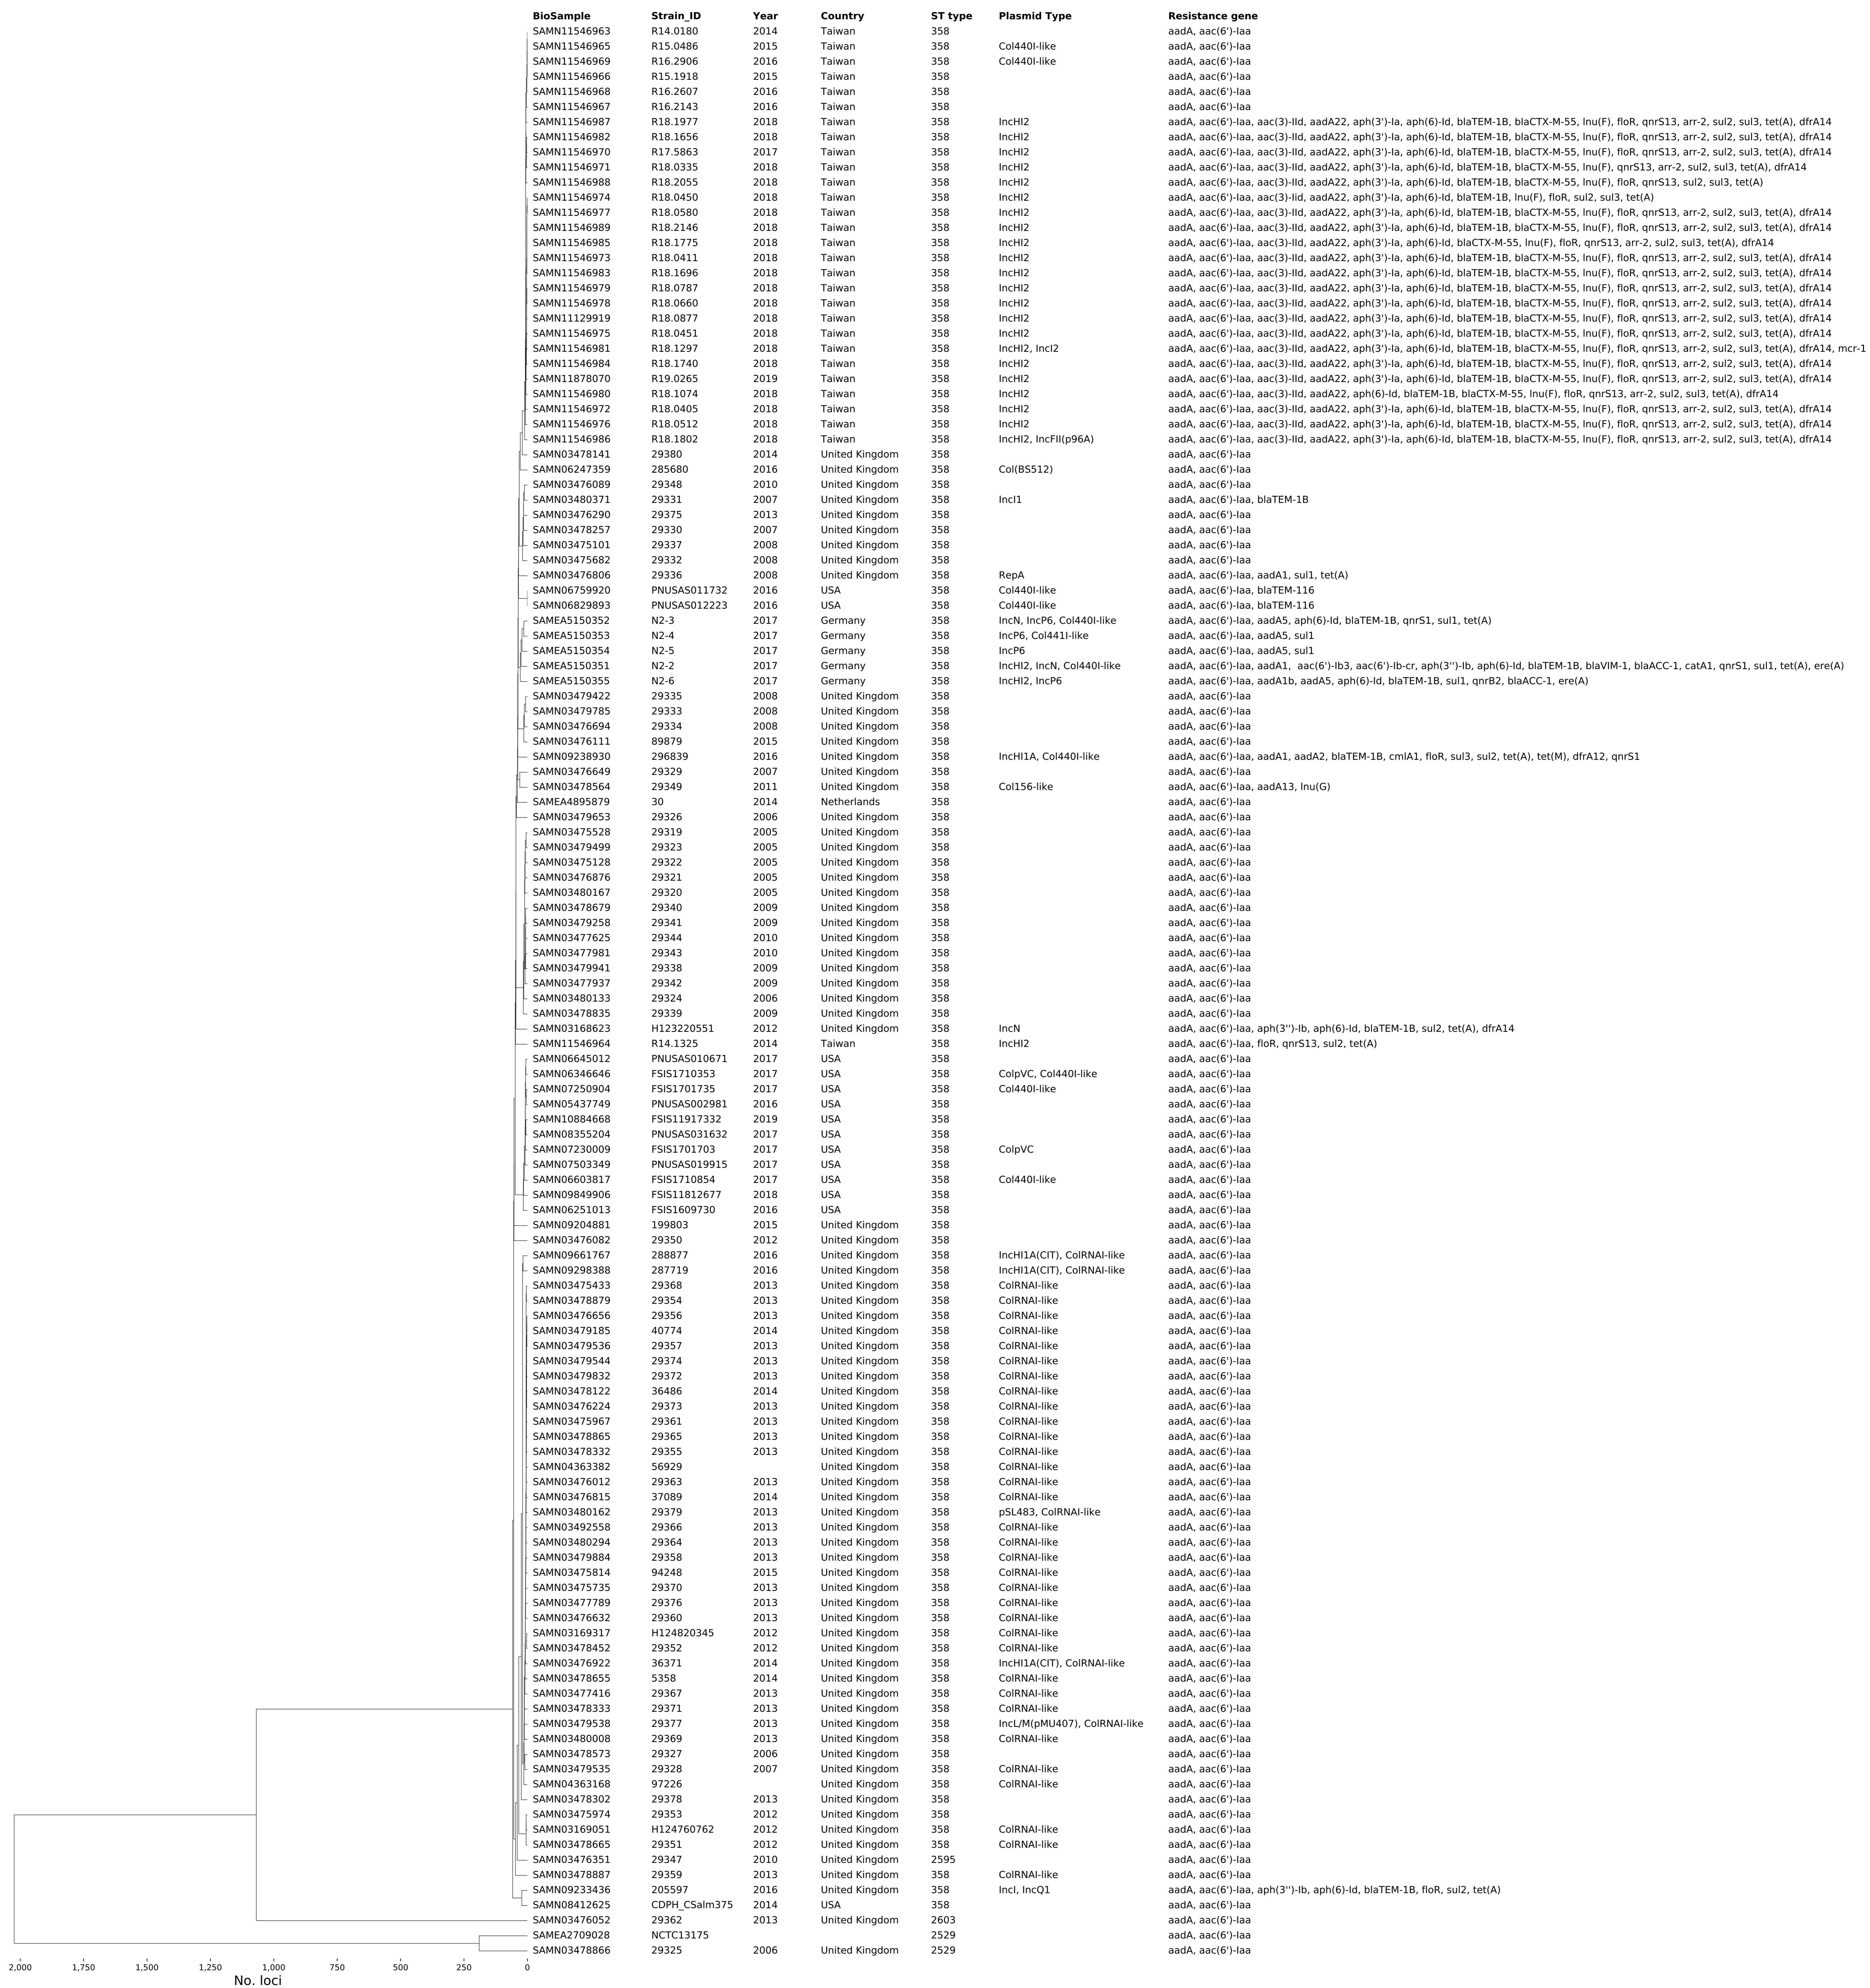

Supplement: AAC.01122-19-s0002.pdf [file AAC.01122-19-s0002.pdf]
